# Supplementary material for: Racial differences in patients referred for right heart catheterization and risk of pulmonary hypertension
Source: PubMed Central journal article supplement — Pulm Circ. 2018 Feb 26;8(2):2045894018764273. doi: 10.1177/2045894018764273 (PMC5858628; doi:10.1177/2045894018764273), 2018-02-26
Supplement: Supplemental_material.pdf [file Supplemental_material.pdf]

## SUPPLEMENTARY TABLES

**Table 1. Right Heart Catheterization Indications**

| <b>Right heart catheterization indication</b> | <b>Percentage of study population (N = 4,576)</b> |
|-----------------------------------------------|---------------------------------------------------|
| Coronary artery disease                       | 26%                                               |
| Heart failure                                 | 19%                                               |
| Pulmonary hypertension                        | 14%                                               |
| Aortic valve disease                          | 9%                                                |
| None given                                    | 8%                                                |
| Mitral valve disease                          | 5%                                                |
| Transplant evaluation (non-cardiac)           | 4%                                                |
| Transplant evaluation (cardiac)               | 3%                                                |
| Atrial septal defect                          | 3%                                                |
| Cardiomyopathy                                | 2%                                                |
| Pericardial disease                           | 2%                                                |
| Congenital heart disease                      | 1%                                                |
| Miscellaneous                                 | < 4%                                              |

**Table 2. Hemodynamic Pulmonary Hypertension Classification**

| Category  | Mean PA pressure (mmHg) | PAWP (mmHg) | PVR (Woods Units) | DPG (mmHg) |
|-----------|-------------------------|-------------|-------------------|------------|
| No PH     | < 25                    | --          | ---               | ---        |
| PAH       | ≥ 25                    | ≤ 15        | > 3               | ---        |
| Ipc-PH    | ≥ 25                    | > 15        | ---               | < 7        |
| Cpc-PH    | ≥ 25                    | > 15        | ---               | ≥ 7        |
| *WHO 3 PH | ≥ 25                    | ≤ 15        | ---               | ---        |

PH = pulmonary hypertension, PAH = pulmonary arterial hypertension, Ipc-PH = isolated post-capillary PH, Cpc-PH = combined pre and post-capillary PH, WHO 3 = World Health Organization group 3, PA = pulmonary artery, PAWP = pulmonary artery wedge pressure, PVR = pulmonary vascular resistance, DPG = diastolic pressure gradient. \*Presence of pulmonary hypertension, PAWP ≤15mmHg, prevalent chronic obstructive lung disease or interstitial lung disease, and absence of another etiology on manual review.

**Table 3. Subgroup Analysis for Adjusted Association of Risk Factors and Pulmonary Hypertension**

| <b>Risk factor</b>   | <b>PAH<br/>(N=564)</b> | <b>lpc-PH<br/>(N=1,456)</b> | <b>Cpc-PH<br/>(N=364)</b> | <b>WHO 3 PH<br/>(N=214)</b> |
|----------------------|------------------------|-----------------------------|---------------------------|-----------------------------|
| AA race              | 1.47 (1.08-2.02)       | 0.83 (0.66-1.04)            | 1.54 (1.12-2.11)          | 2.01 (1.11-3.64)            |
| Age                  | 0.54 (0.40-0.74)       | 1.50 (1.20-1.86)            | 0.63 (0.44-0.90)          | 0.55 (0.31-1.00)            |
| Male gender          | 0.44 (0.34-0.57)       | 1.06 (0.89-1.25)            | 1.01 (0.76-1.34)          | 0.47 (0.30-0.75)            |
| Heart failure        | 2.16 (1.69-2.76)       | 1.84 (1.55-2.18)            | 1.61 (1.19-2.16)          | 0.67 (0.42-1.07)            |
| LV ejection fraction | 1.94 (1.64-2.30)       | 0.63 (0.57-0.70)            | 0.86 (0.73-1.01)          | 2.47 (1.68-3.63)            |
| LV hypertrophy       | 0.91 (0.70-1.18)       | 1.14 (0.96-1.35)            | 1.10 (0.83-1.45)          | 0.74 (0.45-1.21)            |
| Hypertension         | 0.46 (0.36-0.60)       | 1.12 (0.89-1.39)            | 0.82 (0.58-1.16)          | 1.00 (0.60-1.67)            |
| Diabetes             | 0.63 (0.49-0.81)       | 1.40 (1.19-1.64)            | 1.17 (0.90-1.54)          | 0.69 (0.44-1.09)            |
| Body mass index      | 0.59 (0.44-0.78)       | 1.28 (1.05-1.56)            | 1.41 (1.03-1.93)          | 1.27 (0.72-2.25)            |
| Creatinine           | 1.29 (1.02-1.62)       | 1.29 (1.12-1.49)            | 1.38 (1.10-1.74)          | 0.91 (0.59-1.39)            |
| COPD                 | --                     | 1.07 (0.86-1.34)            | 1.39 (0.99-1.95)          | 26 (16-43)                  |
| ILD                  | --                     | 0.52 (0.36-0.74)            | 1.79 (1.16-2.75)          | 35 (22-56)                  |

AA = African-American, LV = left ventricular, COPD = chronic obstructive pulmonary disease, ILD = interstitial lung disease, PAH = pulmonary arterial hypertension, lpc-PH = isolated post capillary pulmonary hypertension (PH), Cpc-PH = combined pre and post-capillary PH, WHO 3 = World Health Organization group 3. No PAH patients had COPD or ILD, as defined in methods.

**Table 4. Subgroup Analysis for Adjusted Mortality Risk by Pulmonary Hypertension Etiology**

| <b>Variables</b> | <b>PAH<br/>(N=564)</b> | <b>lpc-PH<br/>(N=1,456)</b> | <b>Cpc-PH<br/>(N=364)</b> | <b>WHO 3 PH<br/>(N=214)</b> |
|------------------|------------------------|-----------------------------|---------------------------|-----------------------------|
| AA race          | 0.91 (0.64-1.30)       | 1.12 (0.88-1.43)            | 1.21 (0.80-1.81)          | 0.95 (0.51-1.77)            |
| Age              | 1.52 (1.12-2.06)       | 1.56 (1.23-1.98)            | 1.83 (1.16-2.88)          | 2.78 (1.50-5.15)            |
| Male gender      | 0.87 (0.65-1.17)       | 1.16 (0.97-1.39)            | 1.06 (0.75-1.50)          | 0.95 (0.61-1.48)            |
| COPD             | --                     | 1.48 (1.20-1.83)            | 1.40 (0.93-2.11)          | 0.70 (0.43-1.13)            |
| Body mass index  | 0.64 (0.44-0.93)       | 0.81 (0.66-0.98)            | 1.06 (0.75-1.48)          | 0.61 (0.32-1.17)            |
| Creatinine       | 1.61 (1.21-2.16)       | 1.32 (1.14-1.53)            | 1.35 (1.01-1.81)          | 0.96 (0.53-1.71)            |

AA = African-American, COPD = chronic obstructive pulmonary disease, PAH = pulmonary arterial hypertension, lpc-PH = isolated post capillary pulmonary hypertension (PH), Cpc-PH = combined pre and post-capillary PH, WHO 3 = World Health Organization group 3. No PAH patients had COPD, as defined in methods

**Table 5. Comparison of Mortality in Patients with Pulmonary Hypertension at 8 Year Follow Up**

| <b>Characteristic</b>                                                       | <b>Survived<br/>(N=1,394)</b> | <b>Died<br/>(N=1,295)</b> | <b>P-value</b> |
|-----------------------------------------------------------------------------|-------------------------------|---------------------------|----------------|
| Age (years)                                                                 | 57 ± 14                       | 62 ± 14                   | < 0.001        |
| Male gender, % (n)                                                          | 48% (669)                     | 52% (667)                 | 0.07           |
| Hypertension, % (n)                                                         | 81% (1,131)                   | 77% (995)                 | 0.006          |
| Coronary artery disease, % (n)                                              | 68% (953)                     | 72% (933)                 | 0.04           |
| Heart failure, % (n)                                                        | 54% (749)                     | 62% (803)                 | < 0.001        |
| Atrial fibrillation, % (n)                                                  | 31% (426)                     | 39% (501)                 | < 0.001        |
| Chronic obstructive pulmonary disease, % (n)                                | 11% (150)                     | 18% (232)                 | < 0.001        |
| Interstitial lung disease, % (n)                                            | 5% (75)                       | 9% (115)                  | < 0.001        |
| Obstructive sleep apnea, % (n)                                              | 13% (180)                     | 12% (153)                 | 0.39           |
| Systemic lupus erythematosus, % (n)                                         | 2% (21)                       | 2% (28)                   | 0.20           |
| Scleroderma, % (n)                                                          | 2% (28)                       | 5% (69)                   | < 0.001        |
| Diabetes mellitus, % (n)                                                    | 39% (544)                     | 46% (602)                 | < 0.001        |
| Obesity, % (n)                                                              | 50% (620)                     | 40% (378)                 | < 0.001        |
| Brain natriuretic peptide (pg/mL)                                           | 583 ± 862                     | 949 ± 1152                | < 0.001        |
| Creatinine (mg/dL)                                                          | 1.2 ± 1.1                     | 1.5 ± 1.4                 | < 0.001        |
| Hemoglobin A1c (%)                                                          | 6.2 ± 1.2                     | 6.3 ± 1.5                 | 0.003          |
| Body mass index (kg/m <sup>2</sup> )                                        | 31 ± 8                        | 29 ± 7                    | < 0.001        |
| Low density lipoprotein (mg/dL)                                             | 94 ± 40                       | 84 ± 38                   | < 0.001        |
| High density lipoprotein (mg/dL)                                            | 42 ± 17                       | 40 ± 18                   | 0.003          |
| Triglycerides (mg/dL)                                                       | 150 ± 150                     | 145 ± 151                 | 0.35           |
| Medications:                                                                |                               |                           |                |
| Any antihypertensive                                                        | 74% (1,031)                   | 72% (938)                 | 0.37           |
| Any diuretic                                                                | 63% (877)                     | 73% (943)                 | < 0.001        |
| Any anticoagulant                                                           | 33% (466)                     | 39% (504)                 | 0.003          |
| Any lipid-lowering agent                                                    | 48% (664)                     | 45% (586)                 | 0.22           |
| *Pulmonary hypertension medications:                                        |                               |                           |                |
| Prostacyclins                                                               | 4% (51)                       | 4% (55)                   | 0.43           |
| Endothelin receptor antagonists                                             | 3% (48)                       | 4% (46)                   | 0.88           |
| Phosphodiesterase inhibitors                                                | 5% (69)                       | 3% (43)                   | 0.04           |
| Any                                                                         | 9% (124)                      | 9% (115)                  | 0.99           |
| *Medications limited to 6 months before date of right heart catheterization |                               |                           |                |
